# Supplementary material
Source: ML conference proceedings conference paper supplement (https://openaccess.thecvf.com/content/cvpr_2016/html/Tan_Proximal_Riemannian_Pursuit_2016_CVPR_paper.html)
Supplement: Supplementary file 1 [file Tan_Proximal_Riemannian_Pursuit_2016_CVPR_supplemental.pdf]

## Supplementary Materials for “Proximal Riemannian Pursuit”

### A. More detailed preliminaries

In this section, we first present more details about the rank- $s$  matrix submanifold  $\mathcal{M}_s = \{\mathbf{X} \in \mathbb{R}^{m \times n} : \text{rank}(\mathbf{X}) = s\}$ , and based on  $\mathcal{M}_s$  we present the geometries on  $\mathcal{M}_{\leq r} = \{\mathbf{X} \in \mathbb{R}^{m \times n} : \text{rank}(\mathbf{X}) \leq r\}$ , where  $s \leq r$ .

#### A.1. Geometries of fixed-rank matrices $\mathcal{M}_s$

The fixed rank- $s$  matrices lie on a smooth submanifold defined below  $\mathcal{M}_s = \{\mathbf{X} \in \mathbb{R}^{m \times n} : \text{rank}(\mathbf{X}) = s\} = \{\mathbf{U} \text{diag}(\boldsymbol{\sigma}) \mathbf{V}^T : \mathbf{U} \in \text{St}_s^m, \mathbf{V} \in \text{St}_s^n, \|\boldsymbol{\sigma}\|_0 = s\}$ , where  $\text{St}_s^m = \{\mathbf{U} \in \mathbb{R}^{m \times s} : \mathbf{U}^T \mathbf{U} = \mathbf{I}\}$  denotes the Stiefel manifold of  $m \times s$  real and orthonormal matrices, and the entries in  $\boldsymbol{\sigma}$  are in descending order [51]. Moreover, the tangent space  $T_{\mathbf{X}}\mathcal{M}_s$  at  $\mathbf{X}$  is given by

$$T_{\mathbf{X}}\mathcal{M}_s = \{\mathbf{U} \mathbf{M} \mathbf{V}^T + \mathbf{U}_p \mathbf{V}^T + \mathbf{U} \mathbf{V}_p^T : \mathbf{M} \in \mathbb{R}^{s \times s}, \mathbf{U}_p \in \mathbb{R}^{m \times s}, \mathbf{U}_p^T \mathbf{U} = \mathbf{0}, \mathbf{V}_p \in \mathbb{R}^{n \times s}, \mathbf{V}_p^T \mathbf{V} = \mathbf{0}\}. \quad (23)$$

Given  $\mathbf{X} \in \mathcal{M}_s$  and  $\mathbf{A}, \mathbf{B} \in T_{\mathbf{X}}\mathcal{M}_s$ , by defining a metric  $g_{\mathbf{X}}(\mathbf{A}, \mathbf{B}) = \langle \mathbf{A}, \mathbf{B} \rangle$ ,  $\mathcal{M}_s$  is a **Riemannian manifold** by restricting  $\langle \mathbf{A}, \mathbf{B} \rangle$  to the *tangent bundle* [2], which is defined as the disjoint union of all tangent spaces  $T\mathcal{M}_s = \bigcup_{\mathbf{X} \in \mathcal{M}_s} \{\mathbf{X}\} \times T_{\mathbf{X}}\mathcal{M}_s$ . The norm of a tangent vector  $\boldsymbol{\zeta}_{\mathbf{X}} \in T_{\mathbf{X}}\mathcal{M}_s$  evaluated at  $\mathbf{X}$  is defined as  $\|\boldsymbol{\zeta}_{\mathbf{X}}\| = \sqrt{\langle \boldsymbol{\zeta}_{\mathbf{X}}, \boldsymbol{\zeta}_{\mathbf{X}} \rangle}$ .

Once the metric is fixed, the notion of the gradient of an objective function can be introduced. For a Riemannian manifold, the **Riemannian gradient** of a smooth function  $f : \mathcal{M}_s \rightarrow \mathbb{R}$  at  $\mathbf{X} \in \mathcal{M}_s$  is defined as the unique tangent vector  $\text{grad}f(\mathbf{X})$  in  $T_{\mathbf{X}}\mathcal{M}_s$ , such that  $\langle \text{grad}f(\mathbf{X}), \boldsymbol{\xi} \rangle = \text{D}f(\mathbf{X})[\boldsymbol{\xi}]$ ,  $\forall \boldsymbol{\xi} \in T_{\mathbf{X}}\mathcal{M}_s$ . As  $\mathcal{M}_s$  is embedded in  $\mathbb{R}^{m \times n}$ , the Riemannian gradient of  $f$  is given as the **orthogonal projection** of the gradient of  $f$  onto the tangent space. Here, the orthogonal projection of any  $\mathbf{Z} \in \mathbb{R}^{m \times n}$  onto the tangent space  $T_{\mathbf{X}}\mathcal{M}_s$  at  $\mathbf{X} = \mathbf{U} \text{diag}(\boldsymbol{\sigma}) \mathbf{V}^T$  is defined as

$$P_{T_{\mathbf{X}}\mathcal{M}_s}(\mathbf{Z}) : \mathbf{Z} \mapsto P_U \mathbf{Z} P_V + P_U^\perp \mathbf{Z} P_V + P_U \mathbf{Z} P_V^\perp. \quad (24)$$

where  $P_U = \mathbf{U} \mathbf{U}^T$  and  $P_U^\perp = \mathbf{I} - \mathbf{U} \mathbf{U}^T$ . Letting  $\mathbf{G} = \nabla f(\mathbf{X})$  be the gradient of  $f(\mathbf{X})$  on vector space, it follows that

$$\text{grad}f(\mathbf{X}) = P_{T_{\mathbf{X}}\mathcal{M}_s}(\mathbf{G}). \quad (25)$$

A *Retraction* mapping on  $\mathcal{M}_s$  relates an element in the tangent space to a corresponding point on the manifold. A retraction mapping is actually an approximated Riemannian exp mapping at the first order. In this paper, for a given tangent vector  $\boldsymbol{\xi}$  at  $\mathbf{X}$ , we will make use of the following projection operator as the retraction mapping [2]. One of the issues associated with such retraction mappings is to find the best rank- $s$  approximation to  $\mathbf{X} + \boldsymbol{\xi}$  in terms of the Frobenius norm

$$\begin{aligned} R_{\mathbf{X}}(\boldsymbol{\xi}) &= P_{\mathcal{M}_s}(\mathbf{X} + \boldsymbol{\xi}) \\ &= \arg \min_{\mathbf{Y} \in \mathcal{M}_s} \|\mathbf{Y} - (\mathbf{X} + \boldsymbol{\xi})\|_F. \end{aligned} \quad (26)$$

where  $\mathbf{X} + \boldsymbol{\xi}$  is defined on the vector space  $\mathbb{R}^{m \times n}$ .  $R_{\mathbf{X}}(\boldsymbol{\xi})$  can be efficiently computed according to Algorithm 1 in the main paper.

## A.2. Variety of low-rank matrices $\mathcal{M}_{\leq r}$

Given an integer  $r \geq s \geq 0$ , it would be more convenient to consider the closure of  $\mathcal{M}_r$ :

$$\mathcal{M}_{\leq r} = \{\mathbf{X} \in \mathbb{R}^{m \times n} : \text{rank}(\mathbf{X}) \leq r\}, \quad (27)$$

which is a real-algebraic variety [44]. Let  $\text{ran}(\mathbf{X})$  be the column space of  $\mathbf{X}$ . In the singular points where  $\text{rank}(\mathbf{X}) = s < r$ , we will construct search directions in the tangent cone [44] (instead of the tangent space)

$$T_{\mathbf{X}}\mathcal{M}_{\leq r} = T_{\mathbf{X}}\mathcal{M}_s \oplus \{\Xi_{r-s} \in \mathcal{U}^\perp \otimes \mathcal{V}^\perp\}, \quad (28)$$

where  $\mathcal{U} = \text{ran}(\mathbf{X})$  and  $\mathcal{V} = \text{ran}(\mathbf{X}^\top)$ . Essentially,  $\Xi_{r-s}$  is a best rank- $(r-s)$  approximation of  $\mathbf{G} - P_{T_{\mathbf{X}}\mathcal{M}_s}(\mathbf{G})$ , which can be cheaply computed with truncated SVD of rank  $(r-s)$ . Let  $\text{grad}f(\mathbf{X}) \in T_{\mathbf{X}}\mathcal{M}_{\leq r}$  be the projection of  $\mathbf{G}$  on  $T_{\mathbf{X}}\mathcal{M}_{\leq r}$ . It can be computed by

$$\text{grad}f(\mathbf{X}) = P_{T_{\mathbf{X}}\mathcal{M}_s}(\mathbf{G}) + \Xi_{r-s}. \quad (29)$$

Given a search direction  $\xi \in T_{\mathbf{X}}\mathcal{M}_{\leq r}$ , we need perform retraction which finds the best approximation by a matrix of rank at most  $r$  as measured in terms of the Frobenius norm, *i.e.*,

$$R_{\mathbf{X}}^{\leq r}(\xi) = \arg \min_{\mathbf{Y} \in \mathcal{M}_{\leq r}} \|\mathbf{Y} - (\mathbf{X} + \xi)\|_F. \quad (30)$$

Since  $\Xi_{r-s} \in \mathcal{U}^\perp \otimes \mathcal{V}^\perp$ ,  $R_{\mathbf{X}}^{\leq r}(\xi)$  w.r.t.  $\mathcal{M}_{\leq r}$  can be efficiently computed with the same complexity as on  $\mathcal{M}_r$ . In general, problem (30) can be addressed by performing SVD on  $\mathbf{X} + \xi$ , which may be computationally expensive.

## A.3. Computation of $R_{\mathbf{X}}^{\leq r}(\xi)$ on $\mathcal{M}_{\leq r}$

Essentially,  $\Xi_{r-s}$  is the best rank- $(r-s)$  approximation of  $\mathbf{G} - P_{T_{\mathbf{X}}\mathcal{M}_s}(\mathbf{G})$  (which can be cheaply computed using truncated SVD of rank  $r-s$ ). In other words,  $\Xi_{r-s}$  is orthogonal to  $\mathbf{G} - P_{T_{\mathbf{X}}\mathcal{M}_s}(\mathbf{G})$ . Let  $\Xi_s = P_{T_{\mathbf{X}}\mathcal{M}_s}(\mathbf{G}) = \mathbf{U}\mathbf{M}\mathbf{V}^\top + \mathbf{U}_p\mathbf{V}^\top + \mathbf{U}\mathbf{V}_p^\top$ ,  $\mathbf{X} = \mathbf{U}\text{diag}(\boldsymbol{\sigma})\mathbf{V}^\top \in \mathcal{M}_s$  and  $\xi = \Xi_s + \Xi_{r-s} \in T_{\mathbf{X}}\mathcal{M}_{\leq r}$ , where  $\Xi_s \in T_{\mathbf{X}}\mathcal{M}_s$  and  $\Xi_{r-s} = \mathbf{U}_s\text{diag}(\boldsymbol{\sigma}_s)\mathbf{V}_s^\top$ .  $\mathbf{X} + \xi$  can be written as  $[\mathbf{U} \ \mathbf{U}_p] \begin{pmatrix} \text{diag}(\boldsymbol{\sigma}) + \mathbf{M} & \mathbf{I}_s \\ \mathbf{I}_s & \mathbf{0} \end{pmatrix} [\mathbf{V} \ \mathbf{V}_p]^\top + \Xi_{r-s}$ , where  $\Xi_{r-s}$  is orthogonal to first term. With these relations,  $R_{\mathbf{X}}^{\leq r}(\xi)$  can be calculated via Algorithm 1.

## B. Proof of Remark 2

*Proof.* When updating  $\mathbf{X}$  with fixed  $\mathbf{E} = \mathbf{E}^{t-1}$ , the step size  $L_t$  is determined such that

$$\Psi(T_{L_t}(\mathbf{X}^t), \mathbf{E}) \leq \Psi(\mathbf{X}^{t-1}, \mathbf{E}^{t-1}) + \beta \langle \text{grad}(\mathbf{X}^{t-1}, \mathbf{E}^{t-1}), \zeta_{t-1} \rangle / L_t.$$

In PRP, we choose  $\zeta_{t-1} = -\text{grad}(\mathbf{X}^{t-1}, \mathbf{E}^{t-1})$ . Thus we have

$$\Psi(T_{L_t}(\mathbf{X}^t), \mathbf{E}^{t-1}) \leq \Psi(\mathbf{X}^{t-1}, \mathbf{E}^{t-1}) - \beta \langle \text{grad}(\mathbf{X}^{t-1}, \mathbf{E}^{t-1}), \text{grad}(\mathbf{X}^{t-1}, \mathbf{E}^{t-1}) \rangle / L_t.$$

Note that  $\text{grad}f(\mathbf{X}^{t-1}, \mathbf{E}^{t-1}) = P_{T_{\mathbf{X}^{t-1}}\mathcal{M}_s}(\mathbf{G}) + \Xi_\kappa^{t-1}$  (see Step 6), and  $\langle P_{T_{\mathbf{X}^{t-1}}\mathcal{M}_s}(\mathbf{G}), \Xi_\kappa^{t-1} \rangle = 0$ . It follows that

$$\Psi(T_{L_t}(\mathbf{X}^t), \mathbf{E}^{t-1}) \leq \Psi(\mathbf{X}^{t-1}, \mathbf{E}^{t-1}) - \beta \|\Xi_\kappa^{t-1}\|_F^2 / L_t. \quad (31)$$

According to Algorithm 2,  $\Psi(T_{L_t}(\mathbf{X}^t), \mathbf{E}^{t-1}) = \Psi(\mathbf{X}_0^t, \mathbf{E}^{t-1})$ . Due to the thresholding on  $\mathbf{E}$ , we have  $\Psi(\mathbf{X}_0^t, \mathbf{E}_0^t) \leq \Psi(\mathbf{X}_0^t, \mathbf{E}^{t-1})$ . Note that  $(\mathbf{X}_0^t, \mathbf{E}_0^t)$  is the starting point of PRG(R). It follows that  $\Psi(\mathbf{X}^t, \mathbf{E}^t) \leq \Psi(\mathbf{X}_0^t, \mathbf{E}_0^t) \leq \Psi(\mathbf{X}_0^t, \mathbf{E}^{t-1}) = \Psi(T_{L_t}(\mathbf{X}^t), \mathbf{E}^{t-1}) \leq \Psi(\mathbf{X}^{t-1}, \mathbf{E}^{t-1}) - \beta \|\Xi_\kappa^{t-1}\|_F^2 / L_t$ . This completes the proof.  $\square$

### C. Proof of Lemma 1

*Proof.* Recall that  $\mathbf{X} = \mathbf{Y} + \boldsymbol{\xi}$ , where  $\mathbf{X}$  lies on the tangent cone  $T_{\mathbf{Y}}\mathcal{M}_{\leq r}$  at  $\mathbf{Y}$ , as illustrated in Figure 3.

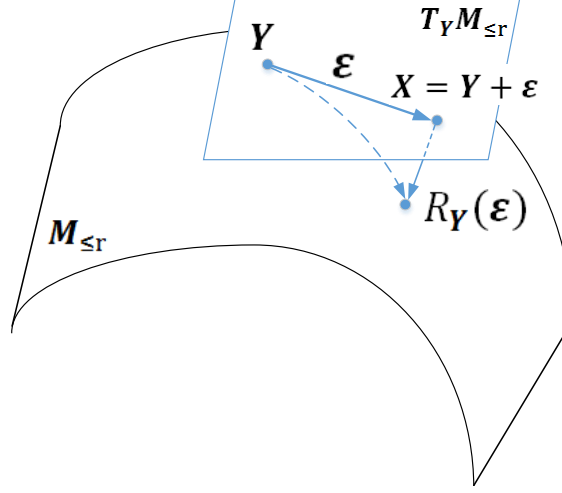

Figure 3. Illustration of Retraction  $R_{\mathbf{Y}}(\boldsymbol{\xi})$  on  $\mathcal{M}_{\leq r}$ .

On the other hand, it is not difficult to verify that

$$\begin{aligned} T_L(\mathbf{Y}) &= \arg \min_{\mathbf{X} \in \mathcal{M}_{\leq r}} \|\mathbf{X}\|_* + f(\mathbf{Y}) + \langle \text{grad} f(\mathbf{Y}), \boldsymbol{\xi} \rangle + \frac{L}{2} \langle \boldsymbol{\xi}, \boldsymbol{\xi} \rangle \\ &= \arg \min_{\mathbf{X} \in \mathcal{M}_{\leq r}} \|\mathbf{X}\|_* + \frac{L}{2} \|\mathbf{X} - \mathbf{Y} + \frac{1}{L} \text{grad} f(\mathbf{Y})\|^2, \end{aligned} \quad (32)$$

where we use the fact that  $\mathbf{X} = \mathbf{Y} + \boldsymbol{\xi}$  which is restricted on the tangent cone  $T_{\mathbf{Y}}\mathcal{M}_{\leq r}$ . Let  $\mathbf{Z} = \mathbf{Y} - 1/L \text{grad} f(\mathbf{Y})$  and

$$Q(\mathbf{X}) = f(\mathbf{Y}) + \langle \text{grad} f(\mathbf{Y}), \boldsymbol{\xi} \rangle + L/2 \langle \boldsymbol{\xi}, \boldsymbol{\xi} \rangle,$$

which is a smooth function. Clearly,  $\mathbf{Z}$  is a minimizer of  $Q(\mathbf{X})$  when  $\boldsymbol{\xi}$  is restricted to  $T_{\mathbf{Y}}\mathcal{M}_{\leq r}$ , thus  $R_{\mathbf{Y}}(\boldsymbol{\xi})$  is a minimizer of  $Q(\mathbf{X})$  when  $\mathbf{X}$  restricted on  $\mathcal{M}_{\leq r}$ . This implies that  $\text{grad} \Phi(R_{\mathbf{Y}}(\boldsymbol{\xi})) = \mathbf{0}$ . In fact,  $R_{\mathbf{Y}}(\boldsymbol{\xi})$  is the basic update rule in [51, 49], where the objective function is smooth.

For the non-smooth objective function in (32), following [6], we can show that, there exists  $\boldsymbol{\zeta} \in \partial \|\mathbf{X}\|_*$  such that  $\text{grad} \Phi(T_L(\mathbf{Y})) + \boldsymbol{\zeta} = \mathbf{0}$ , i.e.,  $T_L(\mathbf{Y})$  satisfies the local optimality condition of (17).

On the other hand, from the computation of  $T_L(\mathbf{Y})$ , we immediately have  $\text{rank}(T_L(\mathbf{Y})) \leq \text{rank}(R_{\mathbf{Y}}(\boldsymbol{\xi})) \leq r$ . In other words, it is a feasible solution. This completes the proof.  $\square$

### D. Proof of Lemma 2

*Proof.* Since  $\boldsymbol{\zeta}_k$  is a descent direction, it follows that  $\mathbf{0} \notin \text{grad} f(\mathbf{X}_k) + \partial \|\mathbf{X}\|_*$  and  $\langle \text{grad} f(\mathbf{X}_k), \boldsymbol{\zeta}_k \rangle < 0$ . Note that  $\Psi(\mathbf{X})$  is bounded below. Since  $T_L(\mathbf{X}_k)$  is continuous in  $L$ , there must exist an  $\hat{L}$  such that  $\Psi(T_L(\mathbf{X}_k)) \leq \Psi(\mathbf{X}_k) + \beta \langle \text{grad} f(\mathbf{X}_k), \boldsymbol{\zeta}_k \rangle / L$ ,  $\forall L \in [\hat{L}, +\infty)$ .  $\square$

Table 3. Computation of  $S_\lambda(\mathbf{B})$ .

| $\Upsilon(\mathbf{E})$  | MR: $\ \mathbf{E}\ _1$                                                                 | LRR: $\ \mathbf{E}\ _{2,1}$                                                                                                       |
|-------------------------|----------------------------------------------------------------------------------------|-----------------------------------------------------------------------------------------------------------------------------------|
| $S_\lambda(\mathbf{B})$ | $\text{sgn}(\mathbf{B}) \odot \max( \mathbf{B}  - \frac{\lambda}{\gamma}, \mathbf{0})$ | $[S_\lambda(\mathbf{B})]_i = \frac{\max(\ \mathbf{b}_i\  - \frac{\lambda}{\gamma}, 0)}{\ \mathbf{b}_i\ } \mathbf{b}_i, \forall i$ |

### E. Proof of Proposition 1

*Proof.* A point  $\mathbf{X}^* \in \mathcal{M}_{\leq r}$  is a local minimizer of (16) if and only if there exists  $\boldsymbol{\varsigma} \in \partial\|\mathbf{X}\|_*$  such that  $\text{grad}f(\mathbf{X}) + \boldsymbol{\varsigma} = \mathbf{0}$  [38]. Note that  $\Psi(\mathbf{X})$  is bounded below. The proof can be completed by adapting the proof of Theorem 3.9 in [44].  $\square$

### F. Proof of Proposition 2

*Proof.* Note that  $\lambda_k$  is non-increasing,  $\mathcal{M}_{\leq r}$  is closed and  $\Psi(\mathbf{X}, \mathbf{E})$  is bounded below.  $\Psi(\mathbf{X}_{k+1}, \mathbf{E}_{k+1}) \leq \Psi(\mathbf{X}_{k+1}, \mathbf{E}_k) \leq \Psi(\mathbf{X}_k, \mathbf{E}_k)$  holds due to the line search w.r.t.  $\mathbf{X}$  and thresholding property on  $\mathbf{E}$ . The convergence of Algorithm 4 can be established by adapting the proof of Theorem 3.9 in [44].  $\square$

### G. Computation of $S_\lambda(\mathbf{B})$

Computation of  $S_\lambda(\mathbf{B})$  is shown in Table 3.

### H. Complexity comparison on LRR and RPCA

At the  $t$ th iteration of PRP, the complexity of PRG or PRG(R) is  $O(mnr)$  for a large  $n$ . To compute  $\Xi_\kappa^t$ , we need to compute truncated SVD on a  $n \times n$  matrix, which takes  $O(n^2\kappa)$  time; while the truncated SVD in existing proximal gradient based methods takes  $O(n^2r)$ . In contrast, for the LRR solver in [30], the time complexity per iteration is  $O(nmr_D + nr_D^2 + r_D^3)$ , where  $r_D$  denotes the rank of  $\mathbf{D}$ . Moreover, for the LRR solver in [29], the time complexity per iteration is  $O(n^2r_Z)$ , where  $r_Z$  denotes the rank of  $\mathbf{Z}$  in that iteration.

For RPCA, suppose the data  $\mathbf{X}$  is of size  $m \times n$ . Since  $\mathbf{X}$  is not sparse, the complexity of RPCA is  $O(mnr)$  in general. However, unlike existing methods, the truncated SVDs in the proposed method are warm-started. As a result, the constant term in  $O(mnr)$  is much reduced.
